# Urotensin II in Invertebrates: From Structure to Function in *Aplysia californica*

Elena V. Romanova<sup>1</sup>, Kosei Sasaki<sup>2</sup>, Vera Alexeeva<sup>2</sup>, Ferdinand S. Vilim<sup>2</sup>, Jian Jing<sup>2</sup>, Timothy A. Richmond<sup>1</sup>, Klaudiusz R. Weiss<sup>2</sup>, Jonathan V. Sweedler<sup>1\*</sup>

**1** Beckman Institute for Advanced Science and Technology and the Department of Chemistry, University of Illinois at Urbana-Champaign, Urbana, Illinois, United States of America, **2** Department of Neuroscience, Mount Sinai School of Medicine, New York, New York, United States of America

## Abstract

Neuropeptides are ancient signaling molecules that are involved in many aspects of organism homeostasis and function. Urotensin II (Ull), a peptide with a range of hormonal functions, previously has been reported exclusively in vertebrates. Here, we provide the first direct evidence that Ull-like peptides are also present in an invertebrate, specifically, the marine mollusk *Aplysia californica*. The presence of Ull in the central nervous system (CNS) of *Aplysia* implies a more ancient gene lineage than vertebrates. Using representational difference analysis, we identified an mRNA of a protein precursor that encodes a predicted neuropeptide, we named *Aplysia* urotensin II (apUll), with a sequence and structural similarity to vertebrate Ull. With *in-situ* hybridization and immunohistochemistry, we mapped the expression of apUll mRNA and its prohormone in the CNS and localized apUll-like immunoreactivity to buccal sensory neurons and cerebral A-cluster neurons. Mass spectrometry performed on individual isolated neurons, and tandem mass spectrometry on fractionated peptide extracts, allowed us to define the posttranslational processing of the apUll neuropeptide precursor and confirm the highly conserved cyclic nature of the mature neuropeptide apUll. Electrophysiological analysis of the central effects of a synthetic apUll suggests it plays a role in satiety and/or aversive signaling in feeding behaviors. Finding the homologue of vertebrate Ull in the numerically small CNS of an invertebrate animal model is important for gaining insights into the molecular mechanisms and pathways mediating the bioactivity of Ull in the higher metazoan.

**Citation:** Romanova EV, Sasaki K, Alexeeva V, Vilim FS, Jing J, et al. (2012) Urotensin II in Invertebrates: From Structure to Function in *Aplysia californica*. PLoS ONE 7(11): e48764. doi:10.1371/journal.pone.0048764

**Editor:** Rudolf Kirchmair, Medical University Innsbruck, Austria

**Received:** June 17, 2012; **Accepted:** October 5, 2012; **Published:** November 8, 2012

**Copyright:** © 2012 Romanova et al. This is an open-access article distributed under the terms of the Creative Commons Attribution License, which permits unrestricted use, distribution, and reproduction in any medium, provided the original author and source are credited.

**Funding:** The project described was supported by Award Number P30 DA018310 from the National Institute on Drug Abuse (NIDA) and Award Numbers NS066587, NS070583, NS031609 from the National Institute of Neurological Disorders and Stroke (NINDS). The funders had no role in study design, data collection and analysis, decision to publish, or preparation of the manuscript.

**Competing Interests:** The authors have declared that no competing interests exist.

\* E-mail: jsweedle@illinois.edu

## Introduction

The cyclic peptide urotensin II is considered the most potent mammalian systemic vasoconstrictor and hypertensive agent identified to date [1,2]. Initially identified from the caudal neurosecretory system of the teleost fish [3,4], the Ull prohormone and its gene were later discovered in phylogenetically higher vertebrates (for review see [5]) such as the green frog [6], mouse and rat [7,8], monkey [9] and human [7]. The RNA encoding the Ull precursor is found in the spinal cord of pig [10], human and frog [11]. In contrast to many of the neuropeptides/hormones in mammals that evolved from ancient versions [12], the mammalian Ull gene has not been reported until this study to have homologous peptide systems in invertebrates. This lack is surprising as prohormone databases for insects, worms and crustaceans have rapidly grown, especially due to the recent advent of high throughput genetic sequencing and peptide prediction and identification methods [13,14,15,16,17,18,19,20,21]. According to the latest evolutionary analysis, the Ull peptide system is thought to have appeared early in vertebrate evolution [22], after the divergence of deuterostomes and protostomes.

Based on mRNA expression and direct mass spectrometric measurement of peptides in individual neurons, here we present

the first direct evidence of the existence of Ull outside of the Chordata, namely in the protostomian mollusk *Aplysia californica*, thus expanding the history of Ull beyond vertebrates.

The high degree of evolutionary conservation of urotensin II across taxa in the animal kingdom suggests that this peptide exerts important physiological actions. Indeed, Ull is widely expressed in the central nervous system (CNS) of frog [6], in cardiovascular and renal systems, and numerous peripheral organs of mammals [23,24,25,26], where it regulates endocrine, cardiovascular, renal, and immune functions [2,5], as well as activates a spectrum of behavioral effects [27] including feeding [28]. With its G-protein-coupled receptor [29,30] located in the heart, lungs, blood vessels, and brain [31], Ull is considered a potential target for human pharmacotherapy [1,24,26,32,33]. Despite its broad occurrence, the existence of specific receptors and the indications of a multiplicity of effects, the functional significance and underlying mechanisms of Ull are difficult to clarify in vertebrates due to the inherent complexity of their behavioral and physiological repertoire. The discrepancy between the localization of the mammalian Ull mRNA and the mature peptide primarily to motoneurons, [7,8,34] and the wide distribution of its known receptor, are frustrating and intriguing at the same time.

Our discovery of the UII prohormone in *Aplysia* creates an opportunity for studying UII actions at the cellular, system and behavioral levels in a well-characterized model organism. Fundamental questions related to the functions of bioactive peptides can be studied conveniently and effectively in *Aplysia* due to its relatively simple nervous system, which allows accessibility to identifiable neurons [35,36]. Moreover, *Aplysia* is an excellent model for studying the transitions between peptide signaling events occurring at the cellular level, and physiology and behavior at organismal levels [37,38,39,40,41,42,43]. The cellular functions of disease-related molecules have been studied in mollusks as well. For instance, molecules related to Alzheimer's disease have recently been tested in the gastropod mollusks *Lymnaea stagnalis* [44] and *Aplysia* [45]. Intriguingly, more orthologs and paralogs of genes associated with human disease are reported in *Aplysia* than in other leading model organisms from Arthropoda (*Drosophila melanogaster*) or Nematoda (*Caenorhabditis elegans*), perhaps due to a slower rate of gene evolution [46,47,48]. The discovery of a UII peptide in an invertebrate model animal may facilitate elucidation of the functional significance of UII in behavior and numerous pathophysiological conditions, and offer insights into the evolution of highly conserved peptide systems shared with humans.

## Results

### Representational Difference Analysis (RDA) to Identify the apUII Transcript

Because the *Aplysia* genome is currently being sequenced [49,50,51,52,53], neither the assembled or annotated genome is yet available (<http://www.broadinstitute.org/scientific-community/science/projects/mammals-models/vertebrates-invertebrates/aplysia/aplysia-genom>). Therefore, neuropeptide prohormones need to be cloned from the CNS. To identify differentially expressed mRNAs that code for neuropeptide prohormones, we performed differential screening using the RDA approach [43]. Because the metacerebral cell (MCC) appears to lack neuropeptides, it makes an excellent "driver" for RDA subtractions. Using two clones from the RDA between the buccal sensory neurons and the MCC, we produced a consensus containing an entire open reading frame of a putative neuropeptide precursor (Fig. 1A) that predicts a neuropeptide (apUII) having sequence similarity to the vertebrate urotensin II. Thus, the prohormone was named apUII due to its shared sequence homology with other known urotensin II peptides in a variety of species (Fig. 1B).

Consistent with the targeting of the peptide precursor to the secretory pathway, the apUII precursor has a hydrophobic signaling sequence at the N-terminus. According to the SignalP signal sequence predictor [54], the signal peptide is most likely cleaved between the A [30] and M [31] residues in the preprohormone.

### Analysis of the apUII Prohormone Structure Confirms Similarity to Vertebrate UII

For the analyses of the prohormone structure, we queried the UniProtKB database with "urotensin II" terms and selected manually annotated (reviewed) entries that were further restricted to the terms "urotensin" in protein name and "2" in protein family. The 19 UniProtKB identifiers were restricted by the range of sequence lengths to exclude incomplete prohormones and sorted by organism. The remaining 12 identifiers were aligned with ClustalW [55]; for rat, mouse and human, two prohormones were included in the alignment, urotensin-2 and -2B. The alignment showed conserved amino acids in the cyclic portion of

the apUII peptide where four positions were identical (including the position of Cys residues), and eight positions were similar across the compared species (Fig. 1B). A phylogenetic tree was generated on the basis of multiple sequence alignments by the neighbor-joining [56] (Fig. 1D).

Similar to other known mature UII isoforms [1], apUII contains a conserved cyclic hexapeptide core sequence (CFWKYC). This cyclic domain is the minimal sequence that retains full biological activity [28] and is structurally similar to that in the functionally important central region of somatostatin-14 (FWKTT) [57]. While this peptide sequence is well conserved, the rest of the prohormone sequences differ considerably from vertebrate analogs. BLAST analysis with the entire apUII precursor showed no significant alignments in the non-redundant database, suggesting that apUII is a novel precursor. BLAST analysis of the apUII peptide sequence revealed a 50–75% similarity to the conlulakin-Lt1 and conlulakin-Lt2 peptides (Fig. 1C) from the lettered cone snail *Conus litteratus* [58].

### Mapping the Expression of apUII in the CNS with *In-situ* Hybridization

Identification of the apUII precursor sequence allowed us to use *in situ* hybridization to determine the distribution of the neurons that contain apUII mRNA in the CNS of *Aplysia*. *In situ* hybridization was performed using the antisense cRNA (generated from the whole sequence as illustrated in Fig. 1A) made with T7 or SP6 RNA polymerase (n = 3). We also performed vector control experiments where only vectors were included, and the antisense apAUII cRNA sequence was omitted. These controls resulted in no staining.

In the present study, we focused on two central ganglia, the buccal and the cerebral, which are involved in the generation of feeding behaviors. Multiple apUII mRNA-positive neuronal somata were observed in both the buccal and cerebral ganglia (Fig. 2). In the buccal ganglion (Fig. 2B, rBG, cBG), strong staining was found in the sensory S1 and S2 clusters [59,60], seen on both the caudal and rostral surfaces (Fig. 2A), a small group of neurons (arrowhead in Fig. 2B, rBG) in the vicinity of the cerebral-buccal connective, and a number of distributed neurons asymmetrically located on the rostral side of both hemiganglia. A small individual neuron (arrow) was stained in the caudal buccal commissure near the radula nerve. In the cerebral ganglion (Fig. 2B, dCG, vCG), intense staining was present in both hemiganglia in the area corresponding to the A-clusters and was mostly seen on the dorsal surface, while a weak staining was localized to the dorsal middle section of the ganglion in the area of the F- and C-clusters.

### Mass Spectrometric Analysis of Prohormone Processing and Posttranslational Modifications (PTMs)

Knowing the translated apUII precursor sequence (Fig. 1B), we employed matrix-assisted laser desorption/ionization (MALDI) mass spectrometry (MS) to directly demonstrate the presence of apUII and determine the posttranslational processing of its precursor at the level of specific neurons. To aid the confirmation of new neuropeptides using MS, we first entered the prohormone sequence into the NeuroPred processing prediction tool (<http://neuroproteomics.scs.illinois.edu/cgi-bin/neuropred.py>) [61]. This revealed a 99%, 98% and 75% cleavage probability at basic amino acids K [43]–R [44], K [83]–R [84], and K [102], respectively, in the apUII precursor sequences. The probability of cleavages at the other basic sites was <50%. NeuroPred also generated a list of peptides potentially resulting from proteolytic processing. MALDI-time-of-flight (TOF) MS was used to analyze the neuropeptides

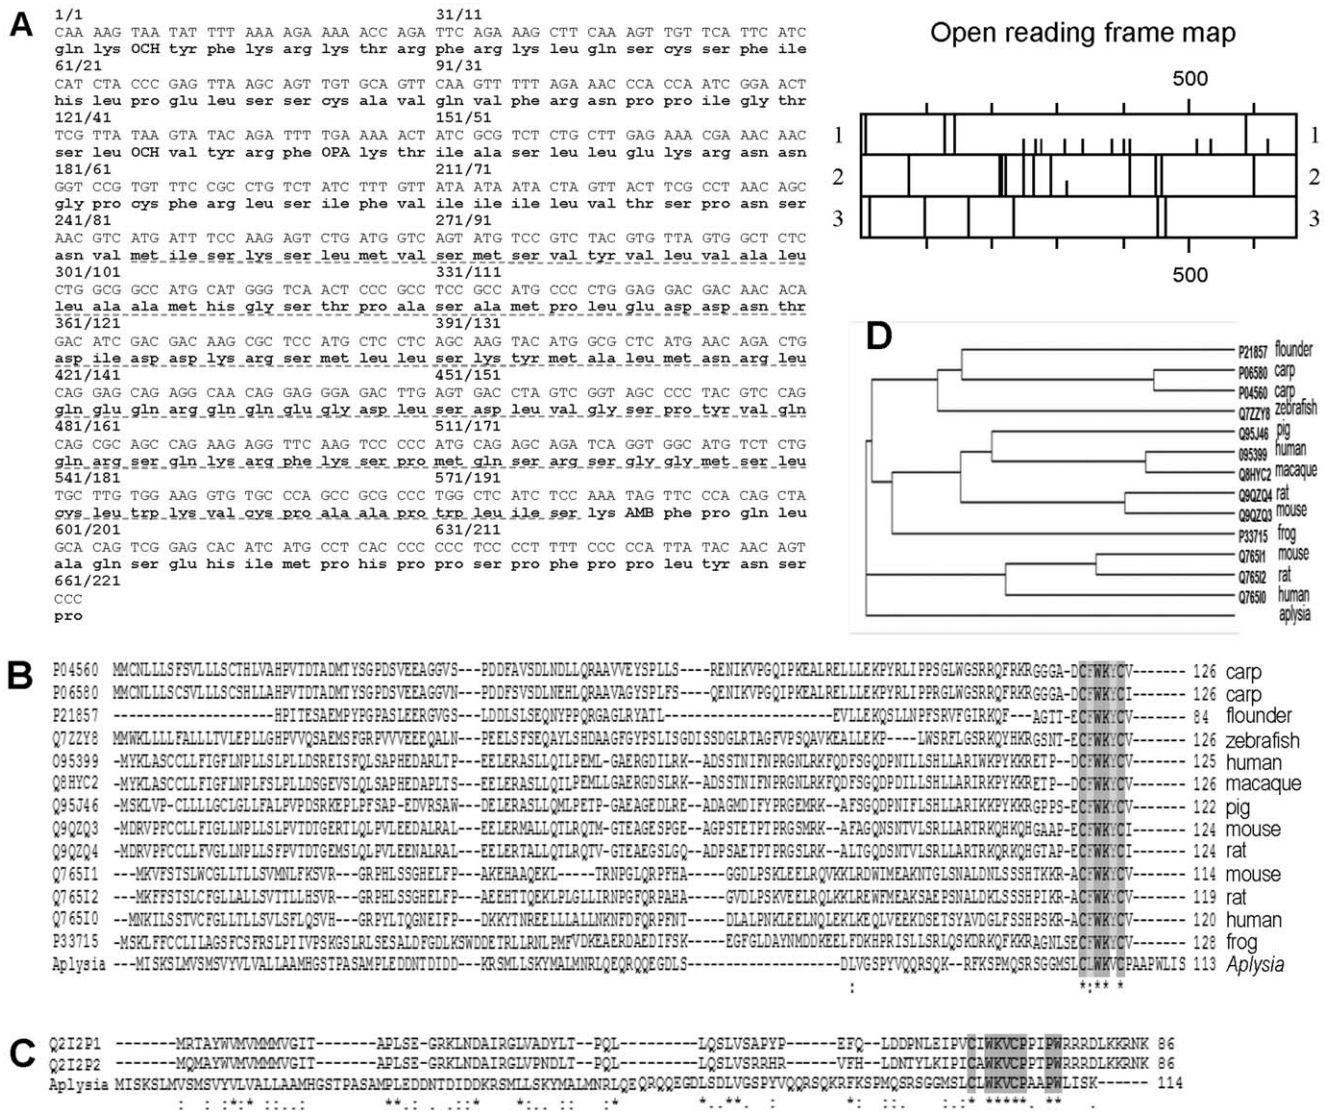

**Figure 1. Sequence of the apUll precursor and its comparison to known homologous sequences from vertebrates. (A)** Consensus cDNA (plain font), translated protein sequence (bold font). Right: open reading frame map (full vertical line, stop codon; half line, met, beginning of protein) shows three reading schemes: 1. as read shown at left, 2. shift right by 1 nucleic acid, 3. shift right by 2 nucleic acids. The map shows Scheme 1 is the most appropriate reading scheme. **(B)** A comparison between known Ull precursor sequences from different species; for human, mouse and rat, urotensin-2B prohormone sequences (Q76510, Q76511, Q76512, respectively) were included in the alignment in addition to Ull sequences. For carp, two sequences found in UniProtKB and differing by a few single amino acid substitutions were also included. Protein accession numbers are shown at left. The BLOSUM62 identity scoring is shaded; the lighter shade represents an identity of >50%, darker shade is 100%. Symbols: “\*\*\*” indicates fully conserved amino acid positions, “:” and “.” indicate strong (>0.5) and weak (≤0.5) positively scoring groups that occur in the Gonnet Pam250 matrix. **(C)** Sequence alignment of apUll and contulakins from the lettered cone snail shows similarity highlighted by the BLOSUM62 method. **(D)** The urotensin II precursor phylogenetic tree calculated by the neighbor-joining method from the multiple sequence alignment. doi:10.1371/journal.pone.0048764.g001

from the sensory neurons of the buccal ganglion (Fig. 3A). Cleavage of the signal peptide between the A [30] and M [31] residues was confirmed by detection of peptide M [31]–D [42]. Both dibasic consensus cleavage sites found on the apUll prohormone and one monobasic site with the highest predicted probability were confirmed by the MALDI MS detection of corresponding peptides M [31]–D [42] (*m/z* 1392.4), S [45]–Q [82] (*m/z* 4430.0), and F [85]–S [112] (*m/z* 3080.7) (see Fig. 1B), in the buccal sensory neurons (BSNs) (Fig. 3A). Peptide F [85]–S [112], which contains the conserved sequence and referred to as apUll, was detected with a mass 2 Da smaller than its theoretical mass, which suggests a PTM in the form of a disulfide bond

between the C [99] and C [104] residues. The apUll peptide is further processed at the monobasic site R [92] (predicted cleavage probability: 46%). The resulting truncated peptide that retains the conserved sequence, S [93]–S [112] (*m/z* 2118.6), named apUll', was detected with a delta mass of 2 Da, which further supports the attribution of the 2 Da mass discrepancy on a larger peptide to the formation of disulfide bonding. The other two peptides were named as apUll-RPI (apUll related peptide I) for M [31]–D [42] and apUll-RPII for S [45]–Q [82]. Potential products of apUll precursor cleavage at other monobasic or unconventional sites were not detected. The data are summarized in the inset table shown in Fig. 3A. Additional masses observed in these samples

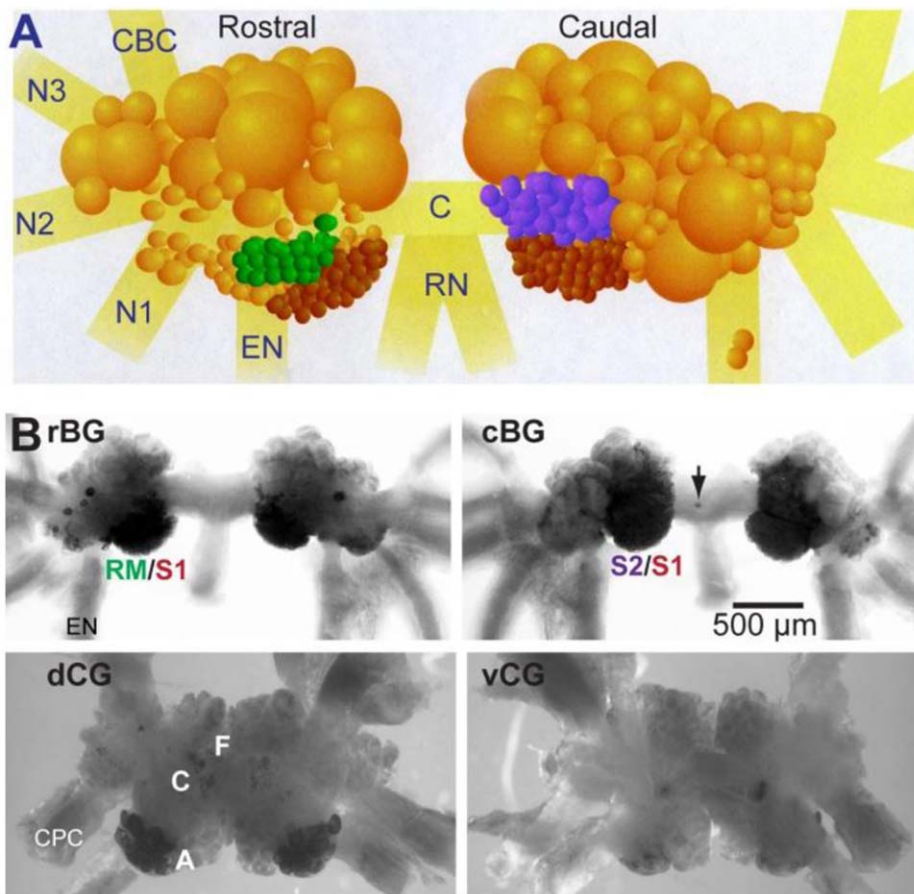

**Figure 2. Distribution of apUll positive neurons in the buccal and cerebral ganglia.** (A) Diagram of the buccal ganglion neurons involved in generating feeding behavior, highlighting the sensory neuron cluster. The larger motoneurons are present as a cluster on the dorsal surface of the ganglion (the larger orange cells above), while the smaller sensory neurons are present in a cluster on the dorsal-medial aspect of the ganglion. The population of buccal sensory neurons is heterogeneous. They are grouped into at least three clusters with distinct sensory properties and transmitter contents. The radula mechanoafferent neurons (green) innervate the subradular tissue and contain SCP and enterin. The S1 sensory neuron cluster (purple) is present only on the caudal surface and is distinguished by a slightly larger size than the S2 sensory neuron cluster (brown). The S1 cluster contains primarily FMRFamide, while S2 contains primarily FRFamide. Here, we show that apUll is expressed in both the S1 and S2 clusters. Note that the commissure is twisted, so that on the left, the rostral surface of the buccal ganglion is shown, while the right side shows the caudal surface. Nerve abbreviations, Com: buccal commissure; CBC: cerebral-buccal connective; EN, esophageal nerve; N, buccal nerve; RN: radular nerve. (B) *In-situ* hybridization staining of the buccal and cerebral ganglion shows the distribution of apUll mRNA expressing neuron somata. The buccal sensory neurons express the mRNA for apUll. Abbreviations, rBG: rostral side of the buccal ganglion; cBG: caudal side of the buccal ganglion; dCG: dorsal side of the cerebral ganglion; vCG: ventral side of the cerebral ganglion. S1, S2, A-, F- and C-neuronal clusters are labeled. doi:10.1371/journal.pone.0048764.g002

were assigned to known prohormone-related products—FMRFa- and FRFa-related peptides [60,62,63], small cardioactive peptides (SCPs) [59,64] and sensorin [65], all shown to be expressed in BSNs. Peptide profiles indicative of expressed prohormones differed between cultured neurons, confirming the previously reported non-uniform biochemical composition of the BSN clusters [60]. Our single-cell MALDI MS analysis of freshly isolated neurons and peptide extracts from cerebral F- and C-clusters did not reveal the presence of apUll peptides, although their presence in those locations was suggested previously on the basis of immunostaining with antibodies raised against a non-*Aplysia* Ull [66].

To obtain an independent verification of the structure of the apUll peptide, we performed tandem MS peptide sequencing on fractionated extracts from cerebral A-clusters and BSNs. Fragmentation of the [93]SGGMSLCLWKVCPAAPWLIS [112] putative peptide that was observed as a doubly charged ion at  $m/z$  1059 verified the sequence corresponding to apUll (Fig. 3B).

Both a long form (apUll [85–112]) and a short form (apUll' [93–112]) of the apUll neuropeptide were detected, as well as peptide apUll-RPII (Fig. 3C). One feature of Ull is its cyclic structure. The presence of the intramolecular disulfide bond on the apUll to create the cyclic peptide structure was verified via tandem MS. Complementary ions series containing the C [99]–C [104] loop were observed, therefore confirming a conserved cyclic peptide structure (Fig. 3B).

#### Localization of apUll Immunoreactivity in the CNS

Immunostaining using an antiserum generated against the 14-aa N-terminal peptide from apUll with sequence [85]FKSPMQSRSGGMSL [98] was performed to localize the neurons and processes that recognize anti-apUll antibody ( $n = 4$ ). To determine the specificity of the antibody, we performed adsorption control where the peptide was first incubated with the antibody, which resulted in no staining. Moreover, the staining patterns of the antibody (Fig. 4A) matched well with the staining

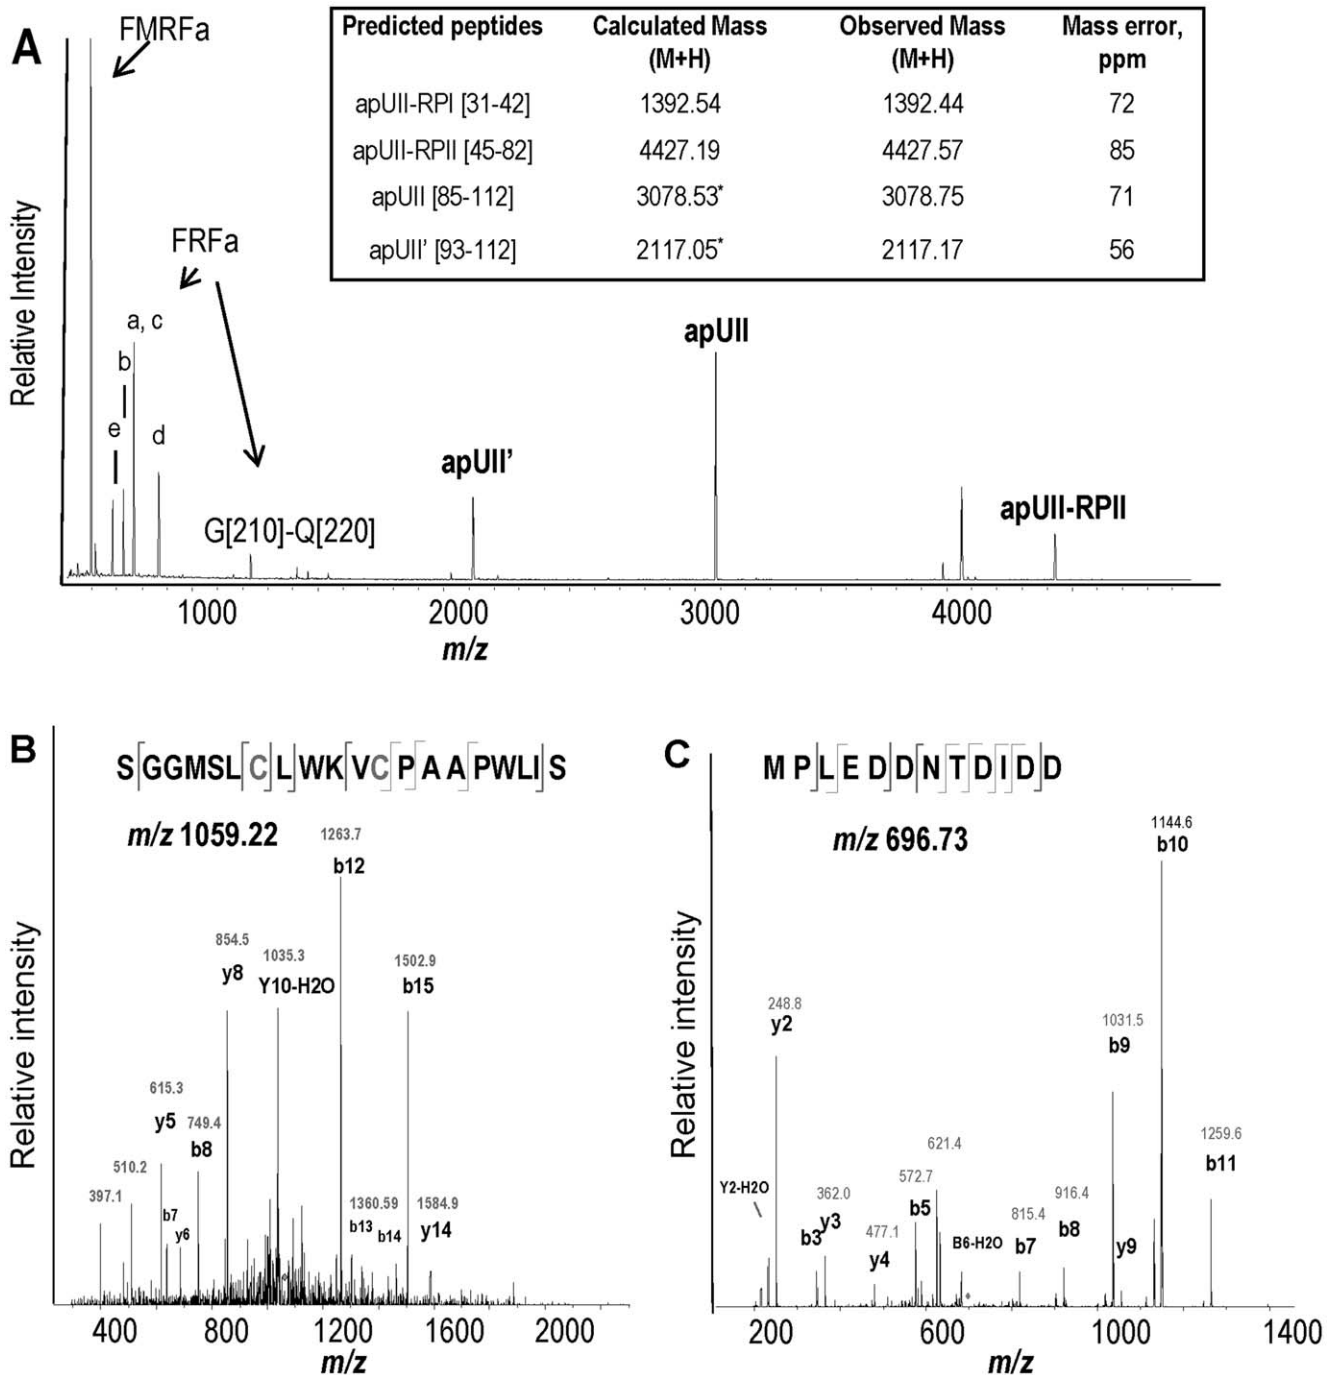

**Figure 3. Mass spectrometric analysis of apUll prohormone processing and structure verification.** (A) Representative MALDI MS spectrum of individual cultured buccal sensory neurons expressing FMRFa, FRFa and apUll prohormones. apUll-derived peptides (in bold), FMRFa, FRFa peptides (a–e) and an apUll linker peptide are labeled. The inset table specifies the accuracy of the apUll peptides measurement; (M+H) is the monoisotopic mass of the protonated molecular ions, (\*) denotes the theoretical mass corrected for the difference from the disulfide bond. (B) Fragmentation spectrum of apUll peptide S [93]-S [112] detected in a +2 charge state with the two red Cys residues highlighted (lower case c). (C) Fragmentation spectrum of apUll peptide S [45]-Q [82] detected in a +2 charge state.  
doi:10.1371/journal.pone.0048764.g003

from the *in situ* hybridization experiments (Fig. 2B), which further supported the specificity of the antibody.

As expected, the S neurons of the BSNs (S1 and S1) were immunoreactive for the apUll antibody (Fig. 4A, rBG, cBG). In addition, two symmetrical, larger neurons on the caudal side in the vicinity of the S-clusters (arrowhead in Fig. 4A, cBG) were brightly

immunoreactive, as well as a lone neuron in the buccal commissure (arrowhead). Likewise, on the rostral side, two symmetrical, larger neurons at the origin of the buccal peripheral nerves showed apUll immunoreactivity, along with S-cluster immunoreactive fibers noted in the radula nerve, cerebral-buccal connectives and buccal peripheral nerves. It appears that radula

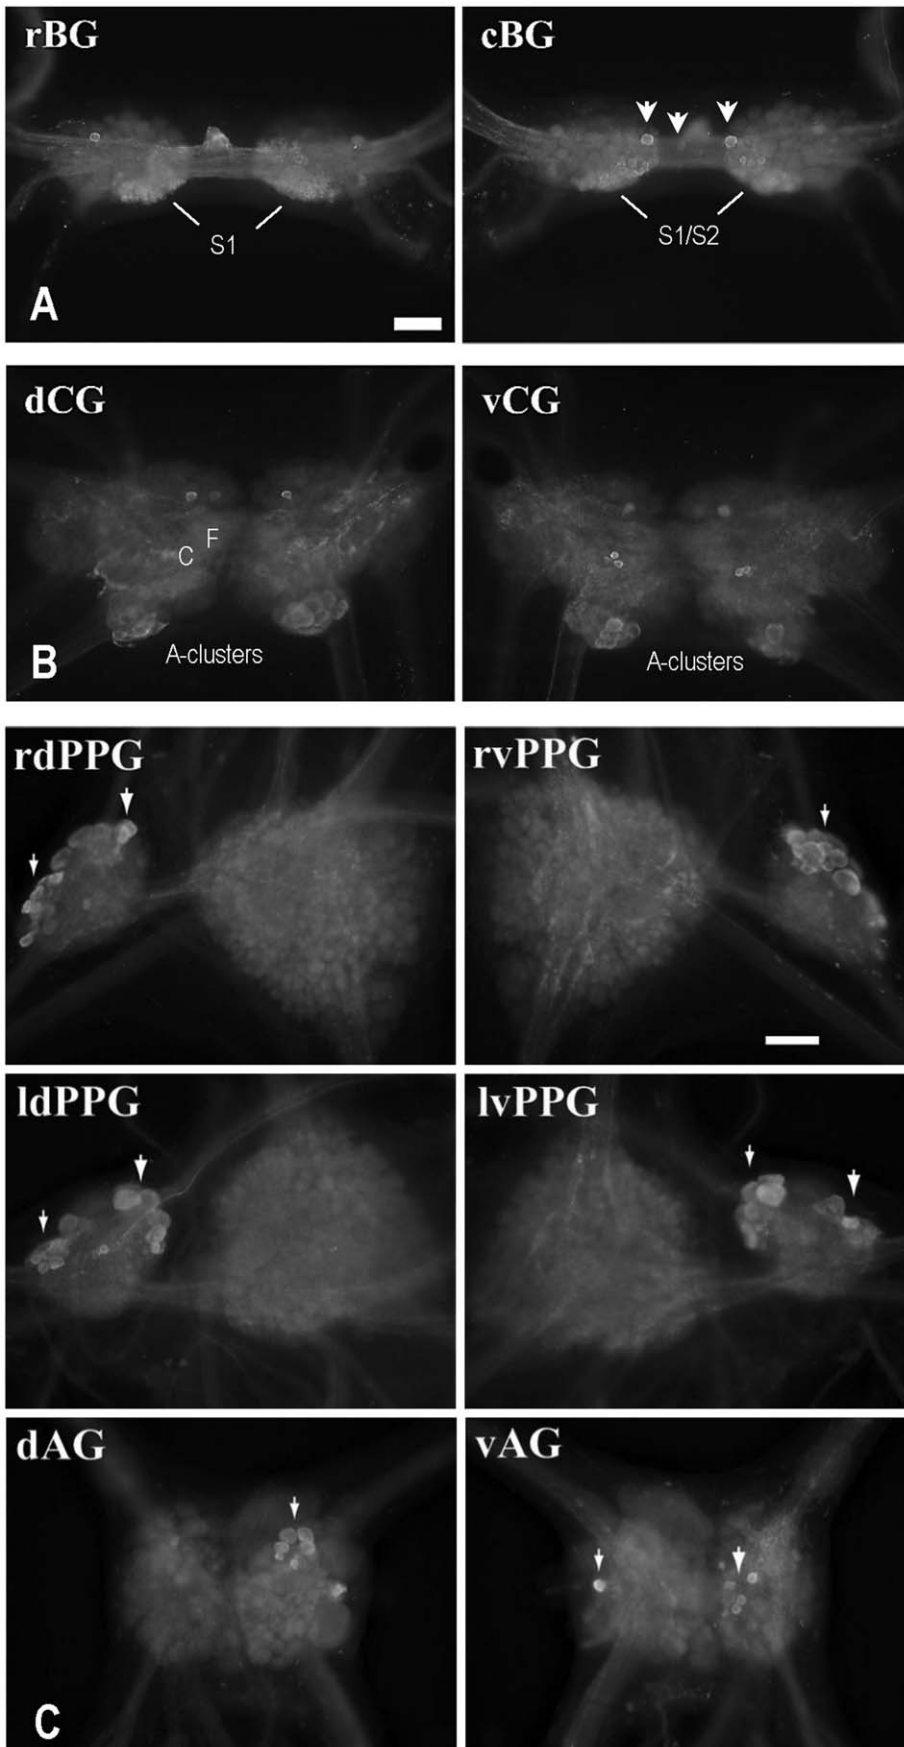

**Figure 4. Immunostaining of apUll-positive neurons and fibers in the Aplysia CNS.** (A) The distribution of immunostained neurons in the buccal ganglion is similar to the *in-situ* hybridization (ISH) staining distribution shown in Figure 2B. Abbreviations, rBG: rostral surface of the buccal ganglion; cBG: caudal surface of the buccal ganglion. Arrowheads point to individual stained neurons. (B) The distribution of immunostained neurons in the cerebral ganglion is similar to the ISH staining distribution shown in Figure 2B. Abbreviations, dCG: dorsal surface of the cerebral ganglion; vCG: ventral surface of the cerebral ganglion; CPC cerebral-pedal connective; A, C, F, neuronal clusters. (C) The distribution of immunostained neurons in the pedal, pleural and abdominal ganglia. Abbreviations, rdPPG: right dorsal pleural-pedal ganglia; ldPPG: left dorsal pleural-pedal ganglia (for these two images, the pleural ganglia are on the left); rvPPG: right ventral pleural-pedal ganglia; lvPPG: left ventral pleural-pedal ganglia (for these two images, the pleural ganglia are on the right); dAG: dorsal abdominal ganglion; vAG: ventral abdominal ganglion. Arrowheads point to stained neurons. Calibration bar for all panels : 200  $\mu$ m.  
doi:10.1371/journal.pone.0048764.g004

mechanoafferent neurons [59], known to innervate subradular tissue, were also slightly immunoreactive to apUll.

In the cerebral ganglion (Fig. 4B, dCG, vCG), the apUll immunoreactive somata were observed on both the ventral and dorsal sides. The immunoreactivity was localized to A-clusters and three sparse neurons in the vicinity of the G-clusters. There was scarce immunostaining in the region of the F- and C-clusters. Diffuse fibrous and punctuate staining appeared on the right dorsal surface of the cerebral ganglion. A few smaller, medium-sized neurons were immunoreactive in the middle section and two symmetrical neurons in the vicinity of the G-cluster border on the ventral side of the cerebral ganglion were prominent. Taken together, apUll, identified using RDA and MS, is present in the *Aplysia* CNS, providing a basis for the functional studies described in the next section.

In addition to the buccal and cerebral ganglia, we also performed apUll immunostaining on two other central ganglia: pleural-pedal and abdominal ganglia, which do not play a major role in feeding. In the pleural-pedal ganglia (Fig. 4C), most apUll immunopositive neurons (arrows) were localized in the pleural ganglia, with virtually no staining in the pedal ganglia. In the abdominal ganglia (Fig. 4C), several apUll immunopositive neurons (arrows) were observed on both the dorsal and ventral surfaces.

### Physiological Activity of apUll in the Feeding Circuit

Expression of the mammalian Ull receptor in the rat brain has suggested an involvement of Ull in feeding behavior [31]. In physiological experiments, we used apUll that contains a highly conserved cyclic C-terminus formed by covalent binding between 2 Cys residues (see Fig. 3). We have not tested apUll-RPI and apUll-RPII, which are not conserved with vertebrate Ull, but are potentially bioactive.

In *Aplysia*, the feeding network is known to be extensively modulated by neuropeptides [38,39,40,42,43,60,67,68,69,70,71]. Here, we examined the possible modulatory actions of apUll in the *Aplysia* feeding network. The feeding motor programs are generated by a central pattern generator (CPG) located in the buccal ganglion [72,73]. All feeding motor programs consist of a protraction-retraction sequence. The radula closure motoneuron B8 can be active during protraction or retraction, depending on the type of motor programs. In ingestive programs, B8 is predominantly active during retraction; while in egestive programs, B8 is predominantly active during protraction. In isolated CNS preparations (Figs. 5A and 6), protraction was monitored via activity in the I2 nerve and in protraction motoneuron B61/62. Retraction was monitored by large unit activity in buccal nerve 2 (BN2) and the depolarization of neurons B4/5 that follows protraction. Radula closure was monitored by activity in B8.

In the first series of experiments, we examined whether apUll had any effect on the motor programs elicited by stimulation of a command-like interneuron, CBI-2, located in the cerebral ganglion (Fig. 5A). CBI-2 was stimulated at 10 Hz for the duration of protraction to elicit single cycle motor programs. In the control

condition, B8 was predominantly active during retraction, thus the program was ingestive. Perfusion of the synthetic peptide (apUll[93–112] internal disulfide bonded) reduced the activity of several motoneurons, including B8 ( $n=9$ , protraction:  $F_{(3,24)}=27.32$ ,  $p<0.0001$ ; retraction:  $F_{(3,24)}=38.1$ ,  $p<0.0001$ ) and B61/62 ( $n=4$ ,  $F_{(3,9)}=141.1$ ,  $p<0.0001$ ), in a concentration-dependent manner (Fig. 5B). Inhibition of CPG activity was also reflected as an increase in the latency to protraction initiation (Fig. 5C1,  $F_{(3,15)}=115.6$ ,  $p<0.0001$ ,  $n=6$ ). Perfusion of apUll also resulted in a small but statistically significant shortening of protraction (Fig. 5C2,  $F_{(3,15)}=4.77$ ;  $p<0.05$ ,  $n=6$ ) and retraction (Fig. 5C3,  $F_{(3,15)}=7.51$ ;  $p<0.01$ ,  $n=6$ ) duration.

In addition, we took advantage of the fact that in some preparations, the CPG can also be spontaneously active in the absence of any stimulation. We found that perfusion of apUll reduced the frequency of spontaneously occurring programs (Figs. 6 and 7,  $F_{(3,6)}=7.63$ ;  $p<0.05$ ,  $n=3$ ). Taken together, these results provide evidence that apUll suppresses the generation of feeding motor programs.

### Discussion

The earlier the origin of a specific peptide system, the greater the probability that paralog lineages exist because of subsequent genome expansion events. Thus, determining whether a specific peptide is present in invertebrates should help to explain the existence of peptides having a wide-range of actions. Multiple peptide genes with known biological functions in mammals are also found in invertebrates, such as those encoding FMRFamide-like peptides and neuropeptide Y (NPY); both FMRFamide and NPY are also found in protostomian flatworms and arthropods [74], and their cDNA and mRNA have been reported in mollusks [75,76]. The RFamide peptide family can be traced as far as back as the cnidaria (hydra) [77] and insulin, and opioid peptide precursors have been reported for unicellular organisms [78].

According to an evolutionary analysis of urotensin peptide systems, Ull is thought to have appeared in chordates after the divergence of deuterostomes and protostomes [22,79]. Among lower vertebrates, Ull has been reported in jawless fish such as lamprey [80], which lack a caudal neurosecretory system. Isolation of Ull peptides from whole brain extracts of the sea lamprey, *Petromyzon marinus*, and the river lamprey, *Lampetra fluviatilis*, which are structurally identical to Ull from the dogfish [81] and skate [82], suggests that the primary structure of Ull was well-conserved phylogenetically among the ancient vertebrates where it may have functioned as a neurotransmitter/neuromodulator in the CNS, rather than as a neurohormone of the caudal neurosecretory system [80]. Here, we present evidence that the Ull prohormone is expressed and can fulfill a signaling function in the protostomian mollusk *A. californica*. This expands the history of Ull beyond vertebrates. To demonstrate the close similarity to the vertebrate peptide, we structurally characterized mature processed peptides and confirmed the existence of the conserved cyclic structure in both the long and the short versions of the peptide that we

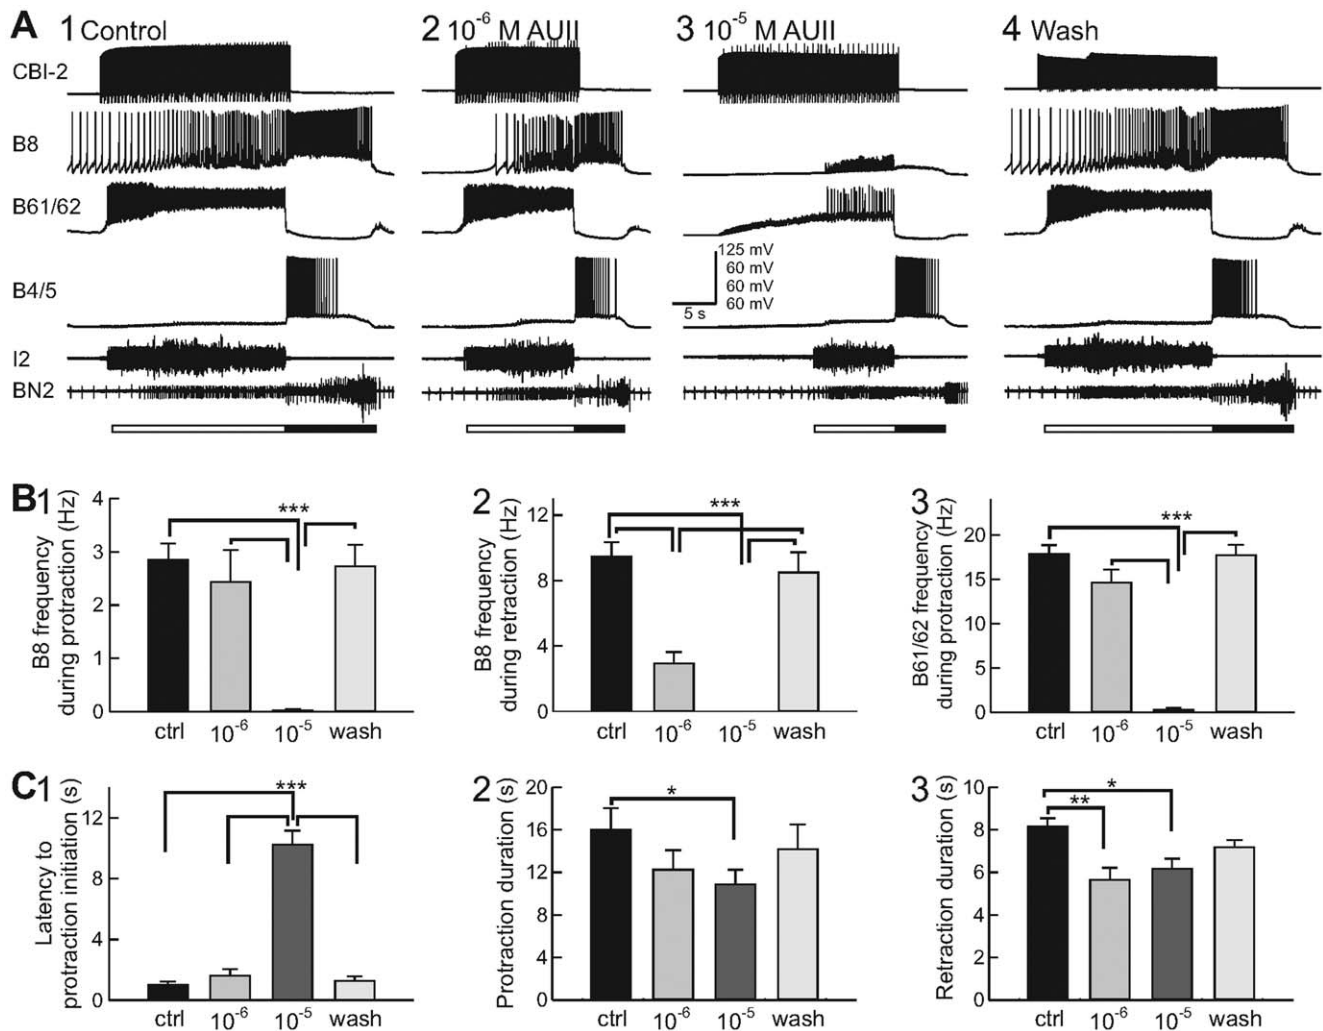

**Figure 5. apUII actions on motor programs elicited by a command-like interneuron CBI-2.** (A) Representative examples. CBI-2 was stimulated throughout the protraction phase (open bar) to elicit single cycle motor programs; the inter-trial interval is 1 min. In control condition (A1), B8 is predominantly active during the retraction phase (filled bar), while B61 is only active during protraction. Perfusion of 10<sup>-6</sup> M (A2) and 10<sup>-5</sup> M (A3) apUII' reduced the firing frequency of both B8 and B61, but had a lesser effect on the firing frequency of B4/5. Protraction is monitored via activity of I2, retraction via activity of BN2. (B) Group data showing the suppressive effects of 10<sup>-6</sup> M and 10<sup>-5</sup> M apUII' on B8 firing frequency during protraction (B1), or during retraction (B2), and B61/62 firing frequency during protraction (B3). (C) Group data showing the lengthening of the latency to protraction initiation, measured as the time that elapsed from the onset of CBI-2 stimulation to the onset of I2 nerve activity (C1). apUII' also reduced protraction duration (C2) and retraction duration (C3). \*, p<0.05; \*\*, p<0.01; \*\*\*, p<0.001; error bars represent SEM. doi:10.1371/journal.pone.0048764.g005

therefore named *Aplysia* urotensin II, or apUII. Our preliminary findings were presented at the annual SFN meeting [83]. To the best of our knowledge, other reported analyses of posttranslational UII prohormone processing were done in flounder [84] and human [85].

The first suggestion of a urotensin-like substance present in *Aplysia* dates back to 1985 when Yui et al. [86] reported immunoreactivity to vertebrate urotensin I (UI) antisera in nerve fibers of the muscle layer of the gut, but not in the endocrine paraneurons. The same study suggested the presence of urotensin-like immunocytochemistry in two other protostomians, silkworm and cricket [86]. Later, the presence of a fish urotensin-like substance was suggested by urotensin-like immunoreactivity in the CNS of *Aplysia* [87,88]. However, these early observations have not been followed up with biochemical peptide characterizations or gene discovery efforts. Likewise, *Aplysia* was one of the first models used to study the modulatory actions of UII. Sawada and

Ichinose [89] reported that when commercial synthetic vertebrate urotensin I and II peptides were applied at "physiological" concentrations, they produced a decrease of neuronal excitability by potentiating the GABA(A) receptor-mediated Cl<sup>-</sup> current in *Aplysia* neurons in a manner suggesting a modulatory, rather than a direct, peptide action. Notably, a small change in the structure of a peptide may lead to activation of different receptors. UI, a fish analog of mammalian corticotropin-releasing factor, has a distinct structure. UI and UII are thought to originate from different ancient ancestors [9,57,79,90]. Thus, the effects of vertebrate UI and UII on *Aplysia* neurons should be interpreted cautiously.

Vertebrate UII and the UII-related peptides (URPs) are thought to originate from the same ancestral gene as the somatostatin and cortistatin genes [4,57,91,92]. Interestingly, somatostatin-like material was found in flowering plants and in *Escherichia coli* grown in defined medium, and it reacted only to C-terminal immunoassays [93,94]. The latest data indicate that the UII/URP



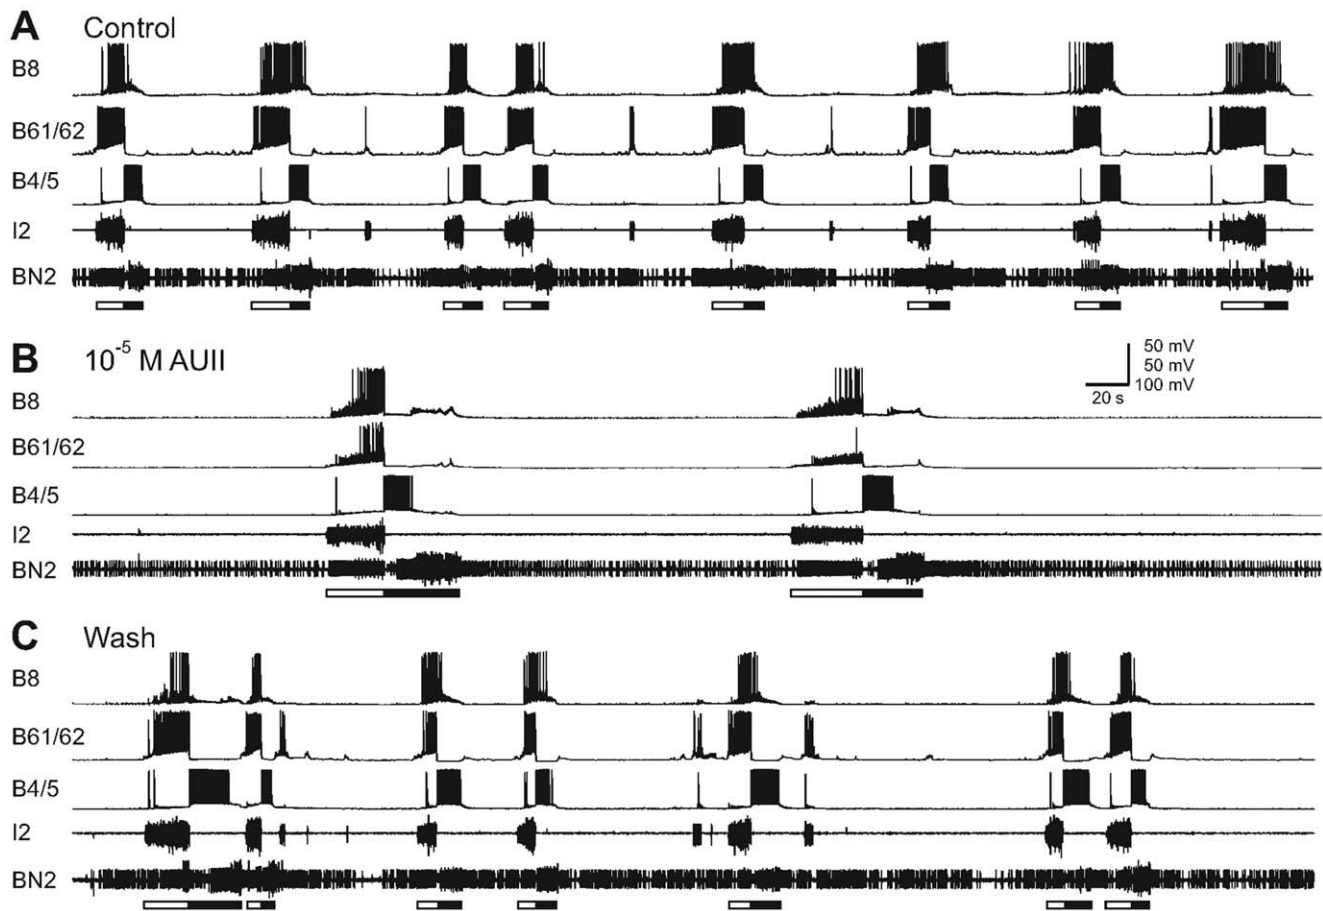

**Figure 6. apUII inhibits the generation of spontaneously occurring programs.** (A) In control condition, motor programs occurred spontaneously. (B) Perfusion of  $10^{-5}$  M apUII reduced the frequency of motor programs. (C) Upon washout of the peptide, motor programs occurred more frequently. Each cycle of motor programs consists of a protraction (open bar) and retraction (filled bar) sequence. doi:10.1371/journal.pone.0048764.g006

and somatostatin genes arose through a segmental duplication of two ancestral genes physically linked to each other, which in turn arose through a tandem duplication of a single ancestral gene. Some authors suggest that URPs and somatostatin-related

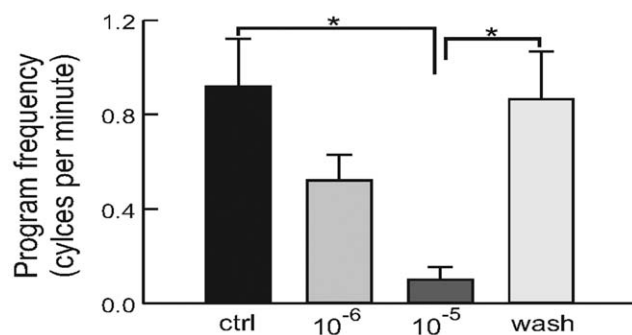

**Figure 7. Summary data showing the effects of  $10^{-6}$  M and  $10^{-5}$  M apUII on the frequency of spontaneously-occurring motor programs.** The frequency of motor programs is the number of cycles per minute measured over a period of 10 minutes or more in each experimental condition. There is a dose-dependent reduction in the frequency of spontaneously-occurring motor programs. \*,  $p < 0.05$ ; error bars represent SEM. doi:10.1371/journal.pone.0048764.g007

peptides may belong to the same superfamily [91]. Our reconstruction of the phylogenetic tree based on multiple UII sequence alignments (Fig. 1D) suggests that the apUII prohormones originate from an ancestral lineage shared with mammalian UII prohormones and thus, may belong to the same superfamily. However, additional data are needed to fully understand apUII gene evolution. Furthermore, apUII has a similarity with contulakin peptides, an atypical, non-cysteine-rich conopeptide group that contains only one cysteine bond [95]. Our findings suggest that the first duplication of an ancestral UII gene may have occurred at a much earlier time in metazoan evolution than the emergence of the teleost fish [57].

As discussed in detail in recent reviews [5,24], due to the potent vasoconstrictor and hypertensive properties of UII in mammals, the focus of many functional studies of UII has been on its endocrine/paracrine actions. However, the broad distribution of UII receptor in the CNS—most recently reviewed by Hunt et al. [96] and do Rego et al. [28]—suggests that this peptide may act as a neuromodulator in sleep regulation, anxiety and behavior. Due to the complex organization of the mammalian brain, it is difficult to study the mechanisms of peptide action. Furthermore, suggestions about the central actions of UII have often been based on the expression patterns of UII receptors and/or pharmacological actions of UII [5]. Interestingly, the expression of a UII receptor in brain regions controlling appetite, food consumption and energy homeostasis [31], as well as studies with

intracerebroventricular UII administration [27], suggest a role for UII in modulating feeding behavior. In our study, we take advantage of the numerically small nervous system of *Aplysia* to characterize the physiologic actions of UII and demonstrate directly that apUII produces powerful cellular and network actions within the animal's feeding circuit.

Elaborate physiological mechanisms control feeding behavior, including those dependent on the interplay between neuropeptidergic pathways. It has been shown that intracerebroventricular injection of UII into the lateral ventricle of mice induces a dose-dependent increase in both food and water intake [97]. The range of active doses of UII is similar to the range that induces anxiogenic- and depressant-like behaviors [28,97]. Neuroanatomical studies on the distribution of UII receptors in the brain provide additional evidence for the involvement of UII and/or URP in the control of appetite and food consumption [27,31].

Here, we validate the modulatory role of apUII in the *Aplysia* feeding network. We show that apUII exerts inhibitory actions on the feeding CPG. These actions are similar to those exerted by FRFamides, another family of neuropeptides expressed in the BSNs [60] (Fig. 2A). The inhibitory actions of the neuropeptides contained in the BSNs suggest that apUII-expressing neurons may have a function in aversive behaviors that include inhibition of feeding responses. Interestingly, the inhibitory actions of these peptides may also contribute to the implementation of a satiety state. Our previous work [40] suggests that the early stage of the satiation process entails generation of more egestive programs that reduce food intake. This stage is followed by an eventual termination of feeding. Indeed, other sensory neuron peptides, SCP [98] and FMRFamide [60], promote generation of egestive programs, while apUII and FRFamide may contribute to the eventual suppression of feeding. Thus, some peptides of the BSNs (Fig. 2A) may act in concert to produce satiety. In summary, discovery of these important peptides in an invertebrate model animal may be expected to facilitate studies that aim to uncover regulatory mechanisms of highly conserved signaling peptidergic systems that lower animals share with humans.

## Materials and Methods

### Animals

For molecular and electrophysiological experiments, *A. californica* weighing 10–20 g were obtained from the University of Miami *Aplysia* Research Facility (Miami, FL) and 100–350 g animals were obtained from Marinus (Long Beach, CA) and Pacific Biomarine (Venice, CA, USA). For analytical experiments, the 80–150 g animals were purchased from Charles Hollahan (Santa Barbara, CA, USA). The animals were kept at 14°C in 150-gallon tanks with circulating artificial seawater (ASW) prepared from Instant Ocean (Aquarium Systems, Mentor, OH, USA). For electrophysiological experiments, animals were used within three weeks of arrival. Prior to dissection, animals were anesthetized by an injection of 30–50% (w/v) of isotonic magnesium chloride into the visceral cavity. Isolated CNS were immediately processed for sample preparation. Cell cluster classification was performed according to previously reported methods [99,100].

### Representational Difference Analysis

Recently we adapted the RDA system [101,102] to identify novel peptides from single identified neurons in the *Aplysia* CNS, as described in detail previously [43]. In brief, the entire procedure can be divided into three steps: (1) Isolation of two types of identified cells. The first is the cell of interest, or “tester”, whose peptides are to be identified; the second cell, or “driver”, is used to

subtract sequences that are shared with the tester. The rationale behind this RDA approach is that the tester shall contain one or more peptides that are not present in the driver. Multiple cells from each cell type are collected in a solution of ice cold 50% propylene glycol, 1.2 M NaCl in diethylpyrocarbonate-treated H<sub>2</sub>O, and stored in –80°C. (2) Amplification of the cDNA from the RNA [103] of the tester and the driver. (3) RDA [101,102] with the amplified cDNA of the tester and the driver. The cDNAs of the driver and tester were digested with DpnII, and the driver cDNA was ligated to R-Bam adaptors, while the tester cDNA was ligated to N-Bam adaptors. The driver DNA was amplified with biotinylated R-Bam primer, and then hybridized with unamplified tester cDNA. Here, we modified the RDA by including a physical subtraction based on biotinylated driver primers, streptavidin incubation and phenol/chloroform extraction [104]. This procedure removed the driver cDNA bound to either the driver cDNA or the tester cDNA because the driver cDNA contained biotinylated adaptor. We then performed the final amplification with tester N-Bam primer to further enrich the sequences that were unique to the tester.

### In-situ Hybridization

*In-situ* hybridization was performed as described previously [103]. Ganglia were digested with 1% protease type IX (Sigma-Aldrich, St. Louis, MO, USA) in 10 mL of artificial sea water (ASW: 460 mM NaCl, 10 mM KCl, 55 mM MgCl<sub>2</sub>, 11 mM CaCl<sub>2</sub>, and 10 mM HEPES, pH 7.6) for 3 h at room temperature (with rocking) to facilitate the removal of the sheath. After digestion, the ganglia were washed with ASW and fixed overnight at 4°C with 4% paraformaldehyde (Electron Microscopy Sciences, Fort Washington, PA, USA) in phosphate-buffered saline (PBS). The ganglia were then washed, desheathed, dehydrated in an ascending ethanol series, and then rehydrated. Following rehydration, the ganglia were prehybridized and then hybridized overnight at 50°C in a buffer solution (50% formamide, 5 mM ethylenediaminetetraacetic acid (EDTA), 5× saline-sodium citrate, 1× Denhardt's solution, 0.1% Tween 20, and 0.5 mg/mL yeast tRNA) containing 2 µg/mL digoxigenin-labeled cRNA probes made from apUII cDNA templates. Following wash-out of the probes, the ganglia were then incubated overnight at 4°C with a 1:200 dilution of alkaline phosphatase-conjugated anti-digoxigenin antibody (Roche Molecular Biochemicals, Indianapolis, IN, USA) in PBS containing 0.1% Tween, 0.2% bovine serum albumin (BSA) and 1% normal goat serum [PBT]. After washes with PBT to remove unbound antibody, the ganglia were washed with detection buffer (100 mM NaCl, 50 mM MgCl<sub>2</sub>, 0.1% Tween 20, 1 mM levamisole, and 100 mM Tris-HCl, pH 9.5) and developed with 4.5 µL of nitroblue tetrazolium and 3.5 µL of 5-bromo-4-chloro-3-indolyl phosphate (Roche Molecular Biochemicals) in 1 mL of detection buffer. The staining reaction was monitored visually and stopped by washing with PBT when the level of staining was adequate. The stained ganglia were photographed using a Nikon microscope (Morrell Instruments, Melville, NY, USA) with epi-illumination against a white background. Photographs were taken with a Nikon CoolPix 990 digital camera (Nikon, USA), imported into Photoshop (Adobe Systems Incorporated, San Jose, CA, USA) and compiled into figures.

### Cell Isolation and MALDI MS

Using the apUII *in situ* hybridization map as guidance, we located the BSN clusters (see Fig. 2A) and cerebral A-clusters in semi-intact ganglia by their relative position, morphology and size. Following treatment with 1% protease IX (Sigma-Aldrich) in ASW supplemented with antibiotics and a 3-h wash in ASW, the

ganglionic sheath was removed and individual BSNs were manually dissociated from isolated clusters. Protease treatments done to a whole isolated CNS in order to digest the outer connective tissue around it do not penetrate into the cell body and therefore, do not affect the dense core vesicles where endogenous neuropeptides are packaged. Using a plastic micropipette, isolated neurons were immediately transferred into a culture dish containing a poly-D-lysine-treated indium tin oxide coated glass slide (Sigma-Aldrich) in ASW, and incubated at +14°C overnight. Then glycerol was added to the dish at a final concentration of 30%, the entire liquid was removed by aspiration, the slide with cultured neurons was air dried for a few minutes, and the location of individual neurons noted with a permanent marker on the bottom of the slide. A MALDI matrix solution (2,5-dihydroxybenzoic acid, 30 mg/mL in 50% acetonitrile (ACN), 0.01% trifluoroacetic acid) was applied over the entire slide using an air brush (Paasche Airbrush, Chicago, IL, USA). Peptide standards were spotted on the corners of the slide.

Cell samples were analyzed by an ultrafleXtreme mass spectrometer equipped with smartbeam and TOF/TOF technologies (Bruker Daltonics, Billerica, MA, USA). Positive ion mass spectra were generated in reflectron mode at a 1 kHz repetition rate. Each representative mass spectrum was a sum of 500–1000 laser shots. We used NeuroPred [61] and the SignalP signal sequence predictor [54] to calculate the predicted peptides and aid in interpreting the mass spectra.

### Purification and Mass Spectrometry of A- and S-Cluster Homogenate

Following dissection, protease treatment and desheathing of the CNS, cerebral A- and buccal S-cluster neurons were manually isolated from four CNS and homogenized in 40  $\mu$ L of acidified acetone (40:6:1, acetone:water:concentrated HCl, by volume) with a plastic homogenizer. The homogenate was centrifuged at 10,000  $\times$  g, and the supernatant removed and dried in a Speed Vac (ThermoSavant, Hollbrook, NY, USA). The concentrated sample was then diluted to 10  $\mu$ L with 0.1% formic acid (FA) and loaded onto an Acclaim<sup>®</sup> PepMap100 Nano-Trap column (200  $\mu$ m  $\times$  2 cm, 5  $\mu$ m particle size, 300 Å pore size) at a 20  $\mu$ L/min flow rate of loading solvent (98% H<sub>2</sub>O, 2% ACN, 0.05% FA) and desalted for 5 min using a Dionex UltiMate 3000 Rapid Separation LC system with a capillary flow selector. The sample was then separated on an Acclaim<sup>®</sup> PepMap100 C18 column (300  $\mu$ m  $\times$  150 mm, 5  $\mu$ m, 100 Å) at a uniform flow rate of 4  $\mu$ L/min with an eluting gradient of 15–50% solvent B (B: 90% ACN, 10% H<sub>2</sub>O, 0.04% FA (v/v); A: 0.05% FA (v/v)) over 50 min. The eluent was directly connected to the electrospray ionization (ESI) probe on an HCT Ultra PTM Discovery System (Bruker Daltonics). The ESI-MS measurements were performed in the data dependent acquisition mode with dynamic exclusion at full scan from  $m/z$  300 to 2000, and a collision-induced dissociation scan at 35% energy. Fragmentation spectra were deconvoluted and exported as Mascot generic files for identification via database search using Peaks Studio 5.3 (Bioinformatics Solutions Inc., Waterloo, ON, Canada). For the database search we used an in-house *Aplysia* database of known published and putative predicted prohormones. The spectra matching the apUII-derived peptides were manually verified for the presence of complimentary ion series confirming the predicted sequence.

### Antibodies and Immunostaining

The apUII N-terminal peptide sequence FKSPMQSRSGGMSL was used to generate the antibodies in rats as described previously [38,39]. Briefly, the antigen was prepared by coupling synthetic peptide (SynPep, Dublin, CA, USA) to BSA (catalog #A0281; Sigma-Aldrich) using 1-ethyl-3-(dimethylaminopropyl)carbodiimide (catalog #E7750; Sigma-Aldrich). The coupled antigen was purified and used to inoculate the rats. Immunocytochemistry was performed as described previously [42]. Tissues were fixed in freshly prepared fixative (4% paraformaldehyde, 0.2% picric acid, 25% sucrose, and 0.1 M NaH<sub>2</sub>PO<sub>4</sub>, pH 7.6). Tissue was permeabilized and blocked by overnight incubation in blocking buffer (10% normal donkey serum, 2% Triton X-100, 1% BSA, 154 mM NaCl, 50 mM EDTA, 0.01% thimerosal, and 10 mM Na<sub>2</sub>HPO<sub>4</sub>, pH 7.4). The primary antibody was diluted 1:250 in the blocking buffer and incubated with the tissue for 4–7 d. The tissue was then washed twice per day for 2–3 d with washing buffer (2% Triton X-100, 1% BSA, 154 mM NaCl, 50 mM EDTA, 0.01% thimerosal, and 10 mM Na<sub>2</sub>HPO<sub>4</sub>, pH 7.4). After the washes, the tissue was incubated with a 1:500 dilution of secondary antibody (lissamine rhodamine donkey anti-rat; Jackson ImmunoResearch, West Grove, PA, USA) for 2–3 d. The tissue was then washed twice with the washing buffer for 1 d and four times with storage buffer (1% BSA, 154 mM NaCl, 50 mM EDTA, 0.01% thimerosal, and 10 mM Na<sub>2</sub>HPO<sub>4</sub>, pH 7.4) for 1 d.

### Analysis of Electrophysiological Activity in the Feeding Circuit

Intracellular and extracellular recordings of physiological activity from the CNS preparations (including the cerebral and buccal ganglia) were performed as previously described [105]. The ganglia were desheathed, transferred to a recording chamber containing ~1.5 mL of ASW, continuously perfused at 0.3 mL/min, and maintained at 14–17°C. Peptides were dissolved in ASW immediately before each application and the ASW with the peptide was perfused into the recording chamber. Intracellular recordings were obtained using 5–10 M $\Omega$  sharp microelectrodes filled with 2 M K acetate and 0.3 M KCl.

Electrophysiological recordings were digitized online with Axoscope (Molecular Devices, Inc., Sunnyvale, CA, USA) and plotted with CorelDraw (Corel Inc., Mountain View, CA, USA). Bar graphs were plotted using SigmaPlot (Systat Software Inc., San Jose, CA, USA). Data are expressed as mean  $\pm$  SEM. Statistical tests (repeated-measures of one-way ANOVA) were performed using Prism (GraphPad Software, La Jolla, CA). When data showed significant effects in ANOVA, further individual comparisons were performed with Bonferroni's correction.

### Acknowledgments

We thank Dr. Stanislav Rubakhin for sharing his expertise on the preparation of cultured neurons for MS analysis. *A. californica* were partially provided by the National Resource for *Aplysia* at the University of Miami under NIH National Center for Research Resources grant RR10294.

### Author Contributions

Conceived and designed the experiments: EVR FSV KRW JVS. Performed the experiments: EVR KS VA FSV JJ TAR. Analyzed the data: EVR KS VA FSV JJ TAR JVS. Wrote the paper: EVR JJ KRW JVS.

## References

- Douglas SA, Ohlstein EH (2000) Human urotensin-II, the most potent mammalian vasoconstrictor identified to date, as a therapeutic target for the management of cardiovascular disease. *Trends Cardiovasc Med* 10: 229–237.
- Watanabe T, Arita S, Shiraiishi Y, Suguro T, Sakai T, et al. (2009) Human urotensin II promotes hypertension and atherosclerotic cardiovascular diseases. *Curr Med Chem* 16: 550–563.
- Bern HA, Lederis K (1969) A reference preparation for the study of active substances in the caudal neurosecretory system of teleosts. *J Endocrinol* 45: Suppl:xi-xii.
- Pearson D, Shively JE, Clark BR, Geschwind, II, Barkley M, et al. (1980) Urotensin II: a somatostatin-like peptide in the caudal neurosecretory system of fishes. *Proc Natl Acad Sci U S A* 77: 5021–5024.
- Vaudry H, Do Rego JC, Le Mevel JC, Chatenet D, Tostivint H, et al. (2010) Urotensin II, from fish to human. *Ann N Y Acad Sci* 1200: 53–66.
- Conlon JM, O'Harte F, Smith DD, Tonon MC, Vaudry H (1992) Isolation and primary structure of urotensin II from the brain of a tetrapod, the frog *Rana ridibunda*. *Biochem Biophys Res Commun* 188: 578–583.
- Coulouarn Y, Jégou S, Tostivint H, Vaudry H, Lihmann I (1999) Cloning, sequence analysis and tissue distribution of the mouse and rat urotensin II precursors. *FEBS Lett* 457: 28–32.
- Coulouarn Y, Fernex C, Jegou S, Henderson CE, Vaudry H, et al. (2001) Specific expression of the urotensin II gene in sacral motoneurons of developing rat spinal cord. *Mech Dev* 101: 187–190.
- Elshourbagy NA, Douglas SA, Shabon U, Harrison S, Duddy G, et al. (2002) Molecular and pharmacological characterization of genes encoding urotensin-II peptides and their cognate G-protein-coupled receptors from the mouse and monkey. *Br J Pharmacol* 136: 9–22.
- Mori M, Sugo T, Abe M, Shimomura Y, Kurihara M, et al. (1999) Urotensin II is the endogenous ligand of a G-protein-coupled orphan receptor, SENR (GPR14). *Biochem Biophys Res Commun* 265: 123–129.
- Coulouarn Y, Lihmann I, Jegou S, Anouar Y, Tostivint H, et al. (1998) Cloning of the cDNA encoding the urotensin II precursor in frog and human reveals intense expression of the urotensin II gene in motoneurons of the spinal cord. *Proc Natl Acad Sci U S A* 95: 15803–15808.
- Le Roith D, Shiloach J, Roth J (1984) Do recent evolutionary studies provide a rational interpretation? In: Chan-Palay V, Palay SL, editors. *Coexistence of Neuroactive Substances in Neurons*. New York: John Wiley and Sons. 411–421.
- Collins JJ 3rd, Hou X, Romanova EV, Lambrus BG, Miller CM, et al. (2010) Genome-wide analyses reveal a role for peptide hormones in planarian germline development. *PLoS Biol* 8: e1000509.
- Hummon AB, Richmond TA, Verleyen P, Baggerman G, Huybrechts J, et al. (2006) From the genome to the proteome: uncovering peptides in the Apis brain. *Science* 314: 647–649.
- Husson SJ, Landuyt B, Nys T, Baggerman G, Boonen K, et al. (2009) Comparative peptidomics of *Caenorhabditis elegans* versus *C. briggsae* by LC-MALDI-TOF MS. *Peptides* 30: 449–457.
- Nassel DR, Winther AM (2010) *Drosophila* neuropeptides in regulation of physiology and behavior. *Prog Neurobiol* 92: 42–104.
- Christie A, Stemmler E, Dickinson P (2010) Crustacean neuropeptides. *Cell Mol Life Sci* 67: 4135–4169.
- Christie AE, McCoolle MD, Harmon SM, Baer KN, Lenz PH (2011) Genomic analyses of the *Daphnia pulex* peptidome. *Gen Comp Endocrinol*.
- Christie AE, Nolan DH, Ohno P, Hartline N, Lenz PH (2010) Identification of chelicerate neuropeptides using bioinformatics of publicly accessible expressed sequence tags. *Gen Comp Endocrinol* 170: 144–155.
- Li B, Predel R, Neupert S, Hauser F, Tanaka Y, et al. (2008) Genomics, transcriptomics, and peptidomics of neuropeptides and protein hormones in the red flour beetle *Tribolium castaneum*. *Genome Res* 18: 113–122.
- Amare A, Sweedler JV (2007) Neuropeptide precursors in *Tribolium castaneum*. *Peptides* 28: 1282–1291.
- Parmentier C, Hameury E, Dubessy C, Quan FB, Habert D, et al. (2011) Occurrence of two distinct urotensin II-related peptides in zebrafish provides new insight into the evolutionary history of the urotensin II gene family. *Endocrinology* 152: 2330–2341.
- Dschietzig T, Bartsch C, Pregla R, Zurbrugg HR, Armbruster FP, et al. (2002) Plasma levels and cardiovascular gene expression of urotensin-II in human heart failure. *Regul Pept* 110: 33–38.
- Ross B, McKendry K, Giada A (2010) Role of urotensin II in health and disease. *Am J Physiol Regul Integr Comp Physiol* 298: R1156–1172.
- McDonald J, Batuwangala M, Lambert DG (2007) Role of urotensin II and its receptor in health and disease. *J Anesth* 21: 378–389.
- Ong KL, Lam KS, Cheung BM (2005) Urotensin II: its function in health and its role in disease. *Cardiovasc Drugs Ther* 19: 65–75.
- Garton J, Parker F, Harrison DC, Douglas SA, Ashmeade TE, et al. (2001) Central effects of urotensin-II following ICV administration in rats. *Psychopharmacology (Berl)* 155: 426–433.
- do Rego J-C, Leprince J, Scalbert E, Vaudry H, Costentin J (2008) Behavioral actions of urotensin-II. *Peptides* 29: 838–844.
- Ames RS, Sarau HM, Chambers JK, Willette RN, Aiyar NV, et al. (1999) Human urotensin-II is a potent vasoconstrictor and agonist for the orphan receptor GPR14. *Nature* 401: 282–286.
- Liu Q, Pong S-S, Zeng Z, Zhang Q, Howard AD, et al. (1999) Identification of urotensin II as the endogenous ligand for the orphan G-protein-coupled receptor GPR14. *Biochem Biophys Res Commun* 266: 174–178.
- Jegou S, Cartier D, Dubessy C, Gonzalez BJ, Chatenet D, et al. (2006) Localization of the urotensin II receptor in the rat central nervous system. *J Comp Neurol* 495: 21–36.
- Desai N, Sajjad J, Frishman WH (2008) Urotensin II: a new pharmacologic target in the treatment of cardiovascular disease. *Cardiol Rev* 16: 142–153.
- Douglas SA, Dhanak D, Johns DG (2004) From 'gills to pills': urotensin-II as a regulator of mammalian cardiorenal function. *Trends Pharmacol Sci* 25: 76–85.
- Dun SL, Brailoiu GC, Yang J, Chang JK, Dun NJ (2001) Urotensin II-immunoreactivity in the brainstem and spinal cord of the rat. *Neurosci Lett* 305: 9–12.
- O'Shea M, Schaffer M (1985) Neuropeptide function: the invertebrate contribution. *Annu Rev Neurosci* 8: 171–198.
- Nusbaum MP, Blitz DM (2012) Neuropeptide modulation of microcircuits. *Curr Opin Neurobiol* 22: 592–601.
- Kandel ER (2001) The molecular biology of memory storage: a dialog between genes and synapses. *Biosci Rep* 21: 565–611.
- Furukawa Y, Nakamaru K, Wakayama H, Fujisawa Y, Minakata H, et al. (2001) The enterins: a novel family of neuropeptides isolated from the enteric nervous system and CNS of *Aplysia*. *J Neurosci* 21: 8247–8261.
- Sweedler JV, Li L, Rubakhin SS, Alexeeva V, Dembrow NC, et al. (2002) Identification and characterization of the feeding circuit-activating peptides, a novel neuropeptide family of *Aplysia*. *J Neurosci* 22: 7797–7808.
- Jing J, Vilim FS, Horn CC, Alexeeva V, Hatcher NG, et al. (2007) From hunger to satiety: reconfiguration of a feeding network by *Aplysia* neuropeptide Y. *J Neurosci* 27: 3490–3502.
- Floyd PD, Li L, Rubakhin SS, Sweedler JV, Horn CC, et al. (1999) Insulin prohormone processing, distribution, and relation to metabolism in *Aplysia californica*. *J Neurosci* 19: 7732–7741.
- Li L, Floyd PD, Rubakhin SS, Romanova EV, Jing J, et al. (2001) Cerebrin prohormone processing, distribution and action in *Aplysia californica*. *J Neurochem* 77: 1569–1580.
- Jing J, Sweedler JV, Cropper EC, Alexeeva V, Park JH, et al. (2010) Feedforward compensation mediated by the central and peripheral actions of a single neuropeptide discovered using representational difference analysis. *J Neurosci* 30: 16545–16558.
- Samarova EI, Bravarenko NI, Korshunova TA, Gulyaeva NV, Palotas A, et al. (2005) Effect of beta-amyloid peptide on behavior and synaptic plasticity in terrestrial snail. *Brain Res Bull* 67: 40–45.
- Shemesh OA, Spira ME (2010) Hallmark cellular pathology of Alzheimer's disease induced by mutant human tau expression in cultured *Aplysia* neurons. *Acta Neuropathol* 120: 209–222.
- Walters ET, Moroz LL (2009) Molluscan memory of injury: evolutionary insights into chronic pain and neurological disorders. *Brain Behav Evol* 74: 206–218.
- Yampolsky L, Bouzinier M (2010) Evolutionary patterns of amino acid substitutions in 12 *Drosophila* genomes. *BMC Genomics* 11: S10.
- Lipinski KJ, Fitzpatrick KA, Lynch M, Katju V, et al. (2011) High spontaneous rate of gene duplication in *Caenorhabditis elegans*. *Curr Biol* 21: 306–310.
- Angerer RC, Davidson EH, Britten RJ (1975) DNA sequence organization in the mollusc *Aplysia californica*. *Cell* 6: 29–39.
- Fiedler TJ, Hudder A, McKay SJ, Shivkumar S, Capo TR, et al. (2010) The transcriptome of the early life history stages of the California Sea Hare *Aplysia californica*. *Comp Biochem Physiol Part D Genomics Proteomics* 5: 165–170.
- Lasek RJ, Dower WJ (1971) *Aplysia californica*: analysis of nuclear DNA in individual nuclei of giant neurons. *Science* 172: 278–280.
- Moroz LL, Edwards JR, Puthanveetil SV, Kohn AB, Ha T, et al. (2006) Neuronal transcriptome of *Aplysia*: neuronal compartments and circuitry. *Cell* 127: 1453–1467.
- Heyland A, Vue Z, Voolstra CR, Medina M, Moroz LL (2011) Developmental transcriptome of *Aplysia californica*. *J Exp Zool B Mol Dev Evol* 316B: 113–134.
- Bendtsen JD, Nielsen H, von Heijne G, Brunak S (2004) Improved prediction of signal peptides: SignalP 3.0. *J Mol Biol* 340: 783–795.
- Larkin MA, Blackshields G, Brown NP, Chenna R, McGettigan PA, et al. (2007) Clustal W and Clustal X version 2.0. *Bioinformatics* 23: 2947–2948.
- Saitou N, Nei M (1987) The neighbor-joining method: a new method for reconstructing phylogenetic trees. *Mol Biol Evol* 4: 406–425.
- Conlon JM, Tostivint H, Vaudry H (1997) Somatostatin- and urotensin II-related peptides: molecular diversity and evolutionary perspectives. *Regul Pept* 69: 95–103.
- Pi C, Liu J, Peng C, Liu Y, Jiang X, et al. (2006) Diversity and evolution of conotoxins based on gene expression profiling of *Conus litteratus*. *Genomics* 88: 809–819.

59. Miller MW, Rosen SC, Schissel SL, Cropper EC, Kupfermann I, et al. (1994) A population of SCP-containing neurons in the buccal ganglion of *Aplysia* are radula mechanoreceptors and receive excitation of central origin. *J Neurosci* 14: 7008–7023.
60. Vilim FS, Sasaki K, Rybak J, Alexeeva V, Cropper EC, et al. (2010) Distinct mechanisms produce functionally complementary actions of neuropeptides that are structurally related but derived from different precursors. *J Neurosci* 30: 131–147.
61. Southey BR, Amare A, Zimmerman TA, Rodriguez-Zas SL, Sweedler JV (2006) NeuroPred: a tool to predict cleavage sites in neuropeptide precursors and provide the masses of the resulting peptides. *Nucleic Acids Res* 34: W267–W272.
62. Ono JK, McCaman RE (1992) In situ hybridization of whole-mounts of *Aplysia* ganglia using non-radioactive probes. *J Neurosci Methods* 44: 71–79.
63. Schaefer M, Picciotto MR, Kreiner T, Kaldany R-R, Taussig R, et al. (1985) *Aplysia* neurons express a gene encoding multiple FMRFamide neuropeptides. *Cell* 41: 457–467.
64. Lloyd PE, Mahon AC, Kupfermann I, Cohen JL, Scheller RH, et al. (1985) Biochemical and immunocytochemical localization of molluscan small cardioactive peptides in the nervous system of *Aplysia californica*. *J Neurosci* 5: 1851–1861.
65. Walters ET, Bodnarova M, Billy AJ, Dulin MF, Diaz-Rios M, et al. (2004) Somatotopic organization and functional properties of mechanosensory neurons expressing sensorin-A mRNA in *Aplysia californica*. *J Comp Neurol* 471: 219–240.
66. Gonzalez GC, Martinez-Padron M, Lederis K, Lukowiak K (1992) Distribution and coexistence of urotensin I and urotensin II peptides in the cerebral ganglia of *Aplysia californica*. *Peptides* 13: 695–703.
67. Furukawa Y, Nakamaru K, Sasaki K, Fujisawa Y, Minakata H, et al. (2003) PRQFVamide, a novel pentapeptide identified from the CNS and gut of *Aplysia*. *J Neurophysiol* 89: 3114–3127.
68. Jing J, Weiss KR (2001) Neural mechanisms of motor program switching in *Aplysia*. *J Neurosci* 21: 7349–7362.
69. Morgan PT, Jing J, Vilim FS, Weiss KR (2002) Interneuronal and peptidergic control of motor pattern switching in *Aplysia*. *J Neurophysiol* 87: 49–61.
70. Proekt A, Vilim FS, Alexeeva V, Brezina V, Friedman A, et al. (2005) Identification of a new neuropeptide precursor reveals a novel source of extrinsic modulation in the feeding system of *Aplysia*. *J Neurosci* 25: 9637–9648.
71. Friedman AK, Weiss KR (2010) Repetition priming of motoneuronal activity in a small motor network: intercellular and intracellular signaling. *J Neurosci* 30: 8906–8919.
72. Hurwitz I, Kupfermann I, Susswein AJ (1997) Different roles of neurons B63 and B34 that are active during the protraction phase of buccal motor programs in *Aplysia californica*. *J Neurophysiol* 78: 1305–1319.
73. Susswein AJ, Byrne JH (1988) Identification and characterization of neurons initiating patterned neural activity in the buccal ganglia of *Aplysia*. *J Neurosci* 8: 2049–2061.
74. Mousley A, Maule AG, Halton DW, Marks NJ (2005) Inter-phyla studies on neuropeptides: the potential for broad-spectrum anthelmintic and/or endectocidal discovery. *Parasitology* 131: S143–S167.
75. Rajpara SM, Garcia PD, Roberts R, Eliassen JC, Owens DF, et al. (1992) Identification and molecular cloning of a neuropeptide Y homolog that produces prolonged inhibition in *Aplysia* neurons. *Neuron* 9: 505–513.
76. Hoek RM, van Kesteren RE, Smit AB, de Jong-Brink M, Geraerts WP (1997) Altered gene expression in the host brain caused by a trematode parasite: neuropeptide genes are preferentially affected during parasitosis. *Proc Natl Acad Sci U S A* 94: 14072–14076.
77. Soloviev M, Takahashi T, Fujisawa T (2010) Peptidomic approaches to the identification and characterization of functional peptides in *Hydra*. *Peptidomics: Humana Press*. 275–292.
78. Harrison LM, Kastin AJ, Weber JT, Banks WA, Hurley DL, et al. (1994) The opiate system in invertebrates. *Peptides* 15: 1309–1329.
79. Lovejoy DA (2009) Structural evolution of urotensin-I: reflections of life before corticotropin releasing factor. *Gen Comp Endocrinol* 164: 15–19.
80. Waugh D, Youson J, Mims SD, Sower S, Conlon JM (1995) Urotensin II from the river lamprey (*Lampetra fluviatilis*), the sea lamprey (*Petromyzon marinus*), and the paddlefish (*Polyodon spathula*). *Gen Comp Endocrinol* 99: 323–332.
81. Conlon JM, O'Harte F, Smith DD, Balment RJ, Hazon N (1992) Purification and characterization of urotensin II and parvalbumin from an elasmobranch fish, *Scyliorhinus canicula* (common dogfish). *Neuroendocrinology* 55: 230–235.
82. Waugh D, Conlon JM (1993) Purification and characterization of urotensin II from the brain of a teleost (trout, *Oncorhynchus mykiss*) and an elasmobranch (skate, *Raja rhina*). *Gen Comp Endocrinol* 92: 419–427.
83. Vilim FS, Sasaki K, Alexeeva V, Romanova EV, Richmond TA, et al. (2007) Identification and characterization of a urotensin II-like peptide in the feeding circuitry of *Aplysia*. *Society for Neuroscience*. San Diego, CA: Neuroscience Meeting Planner, program 288.9.
84. Conlon JM, Arnold-Reed D, Balment RJ (1990) Post-translational processing of prepro-urotensin II. *FEBS Lett* 266: 37–40.
85. Chartrel N, LePrince J, Dujardin C, Chatenet D, Tollemer H, et al. (2004) Biochemical characterization and immunohistochemical localization of urotensin II in the human brainstem and spinal cord. *J Neurochem* 91: 110–118.
86. Yui R, Iwanaga T, Kuramoto H, Fujita T (1985) Neuropeptide immunocytochemistry in protostomian invertebrates, with special reference to insects and molluscs. *Peptides* 6: 411–415.
87. Gonzalez GC, Martinez-Padron M, Ko D, Lukowiak K, Lederis K (1991) Urotensin I-like immunoreactivity in the central nervous system of *Aplysia californica*. *Peptides* 12: 787–793.
88. Gonzalez GC, Roger I, Gonzalez E, Martinez-Padron M, Moore GJ, et al. (1995) Angiotensinogen-like epitopes are present in the CNS of *Aplysia californica* and co-localize with urotensin I- and urotensin II-like immunoreactivities in the cerebral ganglia. *Neuroreport* 6: 541–544.
89. Sawada M, Ichinose M (1999) Potentiation of GABA(A) receptor-mediated Cl<sup>-</sup> current by urotensin peptides in identified *Aplysia* neurons. *J Neurosci Res* 56: 547–552.
90. Lovejoy DA, Balment RJ (1999) Evolution and Physiology of the Corticotropin-Releasing Factor (CRF) Family of Neuropeptides in Vertebrates. *Gen Comp Endocrinol* 115: 1–22.
91. Tostivint H, Joly L, Lihmann I, Parmentier C, Lebon A, et al. (2006) Comparative genomics provides evidence for close evolutionary relationships between the urotensin II and somatostatin gene families. *Proc Natl Acad Sci U S A* 103: 2237–2242.
92. Tostivint H, Lihmann I, Vaudry H (2008) New insight into the molecular evolution of the somatostatin family. *Mol Cell Endocrinol* 286: 5–17.
93. LeRoith D, Pickens W, Crosby LK, Berelowitz M, Holtgreve M, et al. (1985) Evidence for multiple molecular weight forms of somatostatin-like material in *Escherichia coli*. *Biochim Biophys Acta* 838: 335–342.
94. LeRoith D, Pickens W, Wilson GL, Miller B, Berelowitz M, et al. (1985) Somatostatin-like material is present in flowering plants. *Endocrinology* 117: 2093–2097.
95. Craig AG, Norberg T, Griffin D, Hoeger C, Akhtar M, et al. (1999) Contulakin-G, an O-glycosylated invertebrate neurotensin. *J Biol Chem* 274: 13752–13759.
96. Hunt BD, Ng LL, Lambert DG (2010) A rat brain atlas of urotensin-II receptor expression and a review of central urotensin-II effects. *Naunyn Schmiedeberg Arch Pharmacol* 382: 1–31.
97. Do-Rego JC, Chatenet D, Orta MH, Naudin B, Le Cudennec C, et al. (2005) Behavioral effects of urotensin-II centrally administered in mice. *Psychopharmacology (Berl)* 183: 103–117.
98. Wu JS, Vilim FS, Hatcher NG, Due MR, Sweedler JV, et al. (2010) Composite modulatory feedforward loop contributes to the establishment of a network state. *J Neurophysiol* 103: 2174–2184.
99. Fiore L, Meunier J-M (1975) A network of synaptic relations in the buccal ganglia of *Aplysia*. *Brain Res* 92: 336–340.
100. Jahan-Parwar B, Fredman SM (1976) Cerebral ganglion of *Aplysia*: cellular organization and origin of nerves. *Comp Biochem Physiol A Comp Physiol* 54: 347–357.
101. Lisitsyn N, Lisitsyn N, Wigler M (1993) Cloning the differences between two complex genomes *Science* 259: 946–951.
102. Hubank M, Schatz DG (1994) Identifying differences in mRNA expression by representational difference analysis of cDNA. *Nucleic Acids Res* 22: 5640–5648.
103. Vilim FS, Alexeeva V, Moroz LL, Li L, Moroz TP, et al. (2001) Cloning, expression and processing of the CP2 neuropeptide precursor of *Aplysia*. *Peptides* 22: 2027–2038.
104. Sive HL, St John T (1988) A simple subtractive hybridization technique employing photoactivatable biotin and phenol extraction. *Nucleic Acids Res* 16: 10937.
105. Sasaki K, Brezina V, Weiss KR, Jing J (2009) Distinct inhibitory neurons exert temporally specific control over activity of a motoneuron receiving concurrent excitation and inhibition. *J Neurosci* 29: 11732–11744.
